# Supplementary material for: Novel Approach for Coexpression Analysis of E2F1–3 and MYC Target Genes in Chronic Myelogenous Leukemia
Source: Hindawi journal article supplement (doi:10.1155/2014/439840), 2014-01-01
Supplement: f1 [file 439840.f1.zip]

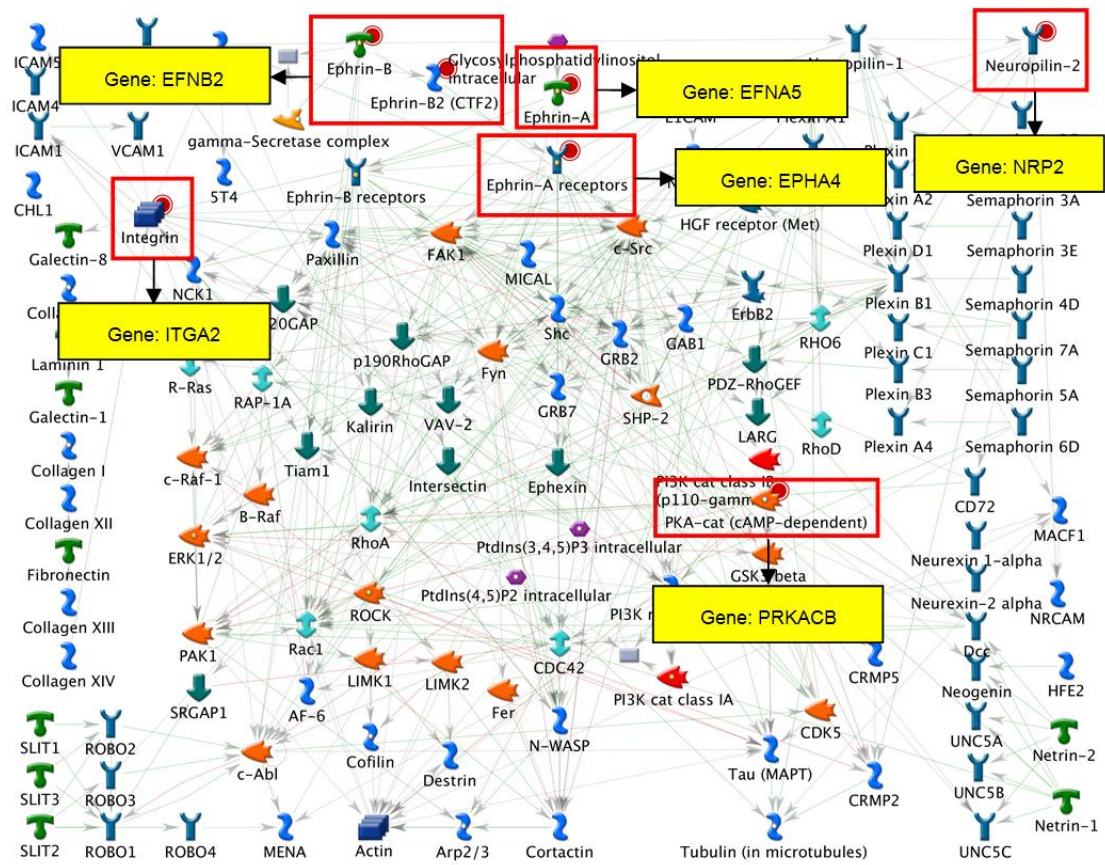

(a)

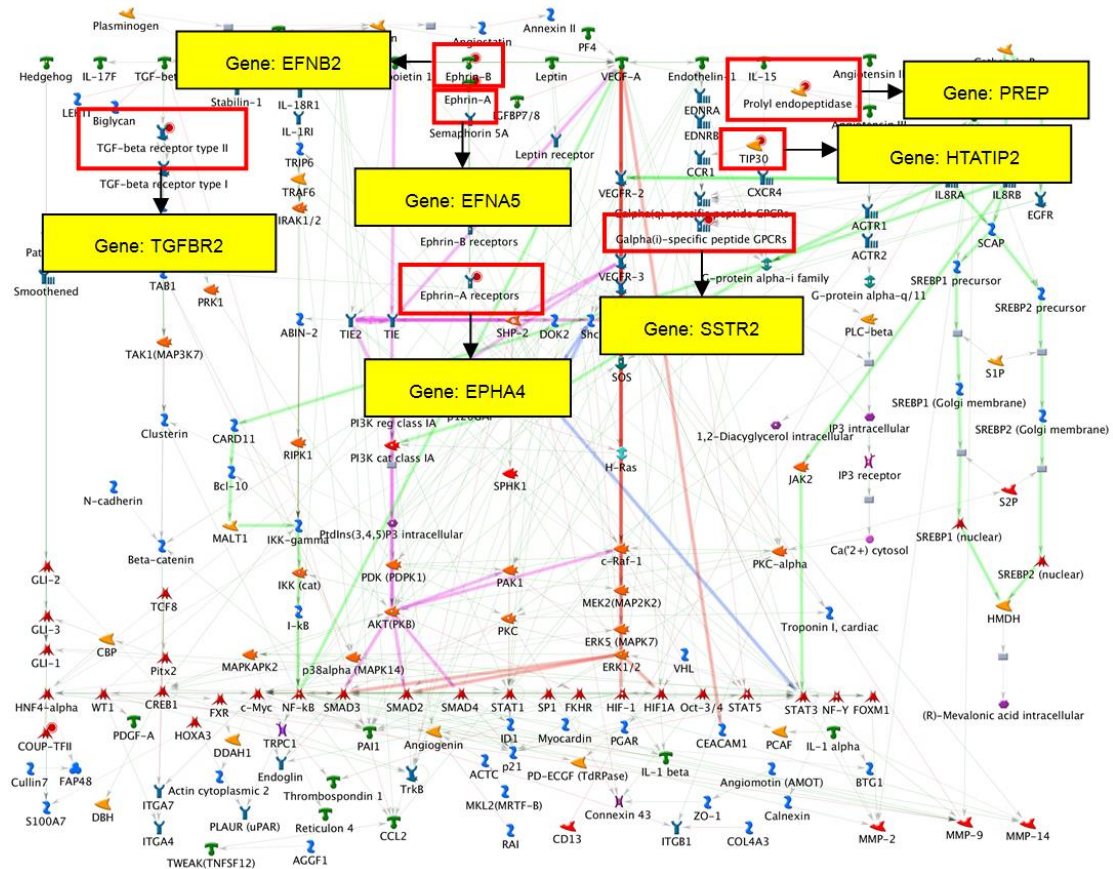

(b)

Figure S2. Functional annotation for the candidate target genes in *MetaCore* process networks. The red rectangles refer to those genes found in the mapped normal-specific strongly co-expressed gene pairs. (a) “*Cell adhesion\_Attractive and repulsive receptors*” process network. (b) “*Development\_Regulation of angiogenesis*” process network.
