# Supplementary material for: Novel Approach for Coexpression Analysis of E2F1–3 and MYC Target Genes in Chronic Myelogenous Leukemia
Source: Hindawi journal article supplement (doi:10.1155/2014/439840), 2014-01-01
Supplement: f1 [file 439840.f1.zip]

**Table S2.** The top 10 enriched process networks from *MetaCore* for functional annotation of 217 candidate target genes.

| #  | Significant process networks                            | Total genes | In our data | p-value                |
|----|---------------------------------------------------------|-------------|-------------|------------------------|
| 1  | Cell adhesion_Synaptic contact                          | 184         | 13          | $1.467 \times 10^{-4}$ |
| 2  | Development_Neurogenesis in general                     | 192         | 12          | $8.064 \times 10^{-4}$ |
| 3  | Development_Hedgehog signaling                          | 254         | 14          | $1.038 \times 10^{-3}$ |
| 4  | Signal transduction_WNT signaling                       | 177         | 11          | $1.394 \times 10^{-3}$ |
| 5  | Signal Transduction_TGF-beta, GDF and Activin signaling | 154         | 10          | $1.654 \times 10^{-3}$ |
| 6  | Cell adhesion_Attractive and repulsive receptors        | 175         | 10          | $4.204 \times 10^{-3}$ |
| 7  | Reproduction_FSH-beta signaling pathway                 | 160         | 9           | $7.211 \times 10^{-3}$ |
| 8  | Development_Regulation of angiogenesis                  | 223         | 11          | $8.168 \times 10^{-3}$ |
| 9  | Cardiac development_BMP_TGF_beta_signaling              | 117         | 7           | $1.252 \times 10^{-2}$ |
| 10 | Neurophysiological process_Melatonin signaling          | 43          | 4           | $1.304 \times 10^{-2}$ |
