# Supplementary material for: Novel Approach for Coexpression Analysis of E2F1–3 and MYC Target Genes in Chronic Myelogenous Leukemia
Source: Biomed Res Int. 2014 Aug 10;2014:439840. doi: 10.1155/2014/439840 (PMC4142389; doi:10.1155/2014/439840)
Supplement: Supplementary file 1 — The flow chart describing the E2F1–3 and MYC target genes co-expression analysis is shown in Figure S1. The functional annotation from MetaCore for the candidate target genes involved in “Cell adhesion_Attractive and repulsive receptors” and “Development_Regulation of angiogenesis” process networks is shown in Figure S2. The 217 candidate target genes of E2F1–3 and MYC that can be found in the microarray dataset GSE5550 are shown in Table S1. The top 10 statistically enriched process networks from MetaCore for the functional annotation of the 217 candidate target genes are shown in Table S2. [file 439840.f1.zip › 439840.f1/Table S1.xls]

## Sheet: 217 common target genes
Candidate target genes regulated concurrently by E2F1–3 and MYC extracted from GSE5550
Official gene symbol	Gene Title
ACVR2A	activin A receptor, type IIA
ADCY7	adenylate cyclase 7
ADCY8	adenylate cyclase 8 (brain)
ADK	adenosine kinase
AKTIP	AKT interacting protein
ANP32A	acidic (leucine-rich) nuclear phosphoprotein 32 family, member A
AP3B1	adaptor-related protein complex 3, beta 1 subunit
API5	apoptosis inhibitor 5
APOC3	apolipoprotein C-III
ATP5G2	ATP synthase, H+ transporting, mitochondrial Fo complex, subunit C2 (subunit 9)
ATP6AP2	ATPase, H+ transporting, lysosomal accessory protein 2
AZI2	5-azacytidine induced 2
BACH2	BTB and CNC homology 1, basic leucine zipper transcription factor 2
BARD1	BRCA1 associated RING domain 1
BMP6	bone morphogenetic protein 6
C1D	C1D nuclear receptor corepressor
C8A	complement component 8, alpha polypeptide
C8B	complement component 8, beta polypeptide
CACNA2D1	calcium channel, voltage-dependent, alpha 2/delta subunit 1
CALCA	calcitonin-related polypeptide alpha
CALCB	calcitonin-related polypeptide beta
CASK	calcium/calmodulin-dependent serine protein kinase (MAGUK family)
CAST	calpastatin
CD180	CD180 molecule
CDH8	cadherin 8, type 2
CDK17	cyclin-dependent kinase 17
CDKN2B	cyclin-dependent kinase inhibitor 2B (p15, inhibits CDK4)
CDKN2C	cyclin-dependent kinase inhibitor 2C (p18, inhibits CDK4)
CDX1	caudal type homeobox 1
CETN3	centrin, EF-hand protein, 3
CNTRL	centrosomal protein 110kDa
COL19A1	collagen, type XIX, alpha 1
COX11	COX11 cytochrome c oxidase assembly homolog (yeast)
CRIM1	cysteine rich transmembrane BMP regulator 1 (chordin-like)
CSNK1G3	casein kinase 1, gamma 3
CTBP2	C-terminal binding protein 2
CYP24A1	cytochrome P450, family 24, subfamily A, polypeptide 1
CYP7B1	cytochrome P450, family 7, subfamily B, polypeptide 1
DACH1	dachshund homolog 1 (Drosophila)
DACT1	dapper, antagonist of beta-catenin, homolog 1 (Xenopus laevis)
DBC1	deleted in bladder cancer 1
DCUN1D1	DCN1, defective in cullin neddylation 1, domain containing 1 (S. cerevisiae)
DLK1	delta-like 1 homolog (Drosophila)
DMXL1	Dmx-like 1
DNAH9	dynein, axonemal, heavy chain 9
DNMT3A	DNA (cytosine-5-)-methyltransferase 3 alpha
DUSP6	dual specificity phosphatase 6
EBF2	early B-cell factor 2
EDN2	endothelin 2
EEF1B2	eukaryotic translation elongation factor 1 beta 2
EFNA5	ephrin-A5
EFNB2	ephrin-B2
EGR3	early growth response 3
ELAVL2	ELAV (embryonic lethal, abnormal vision, Drosophila)-like 2 (Hu antigen B)
EPHA4	EPH receptor A4
ERCC5	excision repair cross-complementing rodent repair deficiency, complementation group 5
ESRRG	estrogen-related receptor gamma
ETNK1	ethanolamine kinase 1
FDX1	ferredoxin 1
FEZ2	fasciculation and elongation protein zeta 2 (zygin II)
FHIT	fragile histidine triad gene
FRZB	frizzled-related protein
FST	follistatin
FXR1	fragile X mental retardation, autosomal homolog 1
GAP43	growth associated protein 43
GATA3	GATA binding protein 3
GBA3	glucosidase, beta, acid 3 (cytosolic)
GBF1	golgi brefeldin A resistant guanine nucleotide exchange factor 1
GCK	glucokinase (hexokinase 4)
GCNT1	glucosaminyl (N-acetyl) transferase 1, core 2
GJA9	gap junction protein, alpha 9, 59kDa
GLRX3	glutaredoxin 3
GOT2	glutamic-oxaloacetic transaminase 2, mitochondrial (aspartate aminotransferase 2)
GPR63	G protein-coupled receptor 63
GRB14	growth factor receptor-bound protein 14
GTF2B	general transcription factor IIB
HABP2	hyaluronan binding protein 2
HIVEP3	human immunodeficiency virus type I enhancer binding protein 3
HNRNPA2B1	heterogeneous nuclear ribonucleoprotein A2/B1
HNRNPAB	heterogeneous nuclear ribonucleoprotein A/B
HOXD4	homeobox D4
HS2ST1	heparan sulfate 2-O-sulfotransferase 1
HSF2	heat shock transcription factor 2
HSPA14	heat shock 70kDa protein 14
HTATIP2	HIV-1 Tat interactive protein 2, 30kDa
IGFBP5	insulin-like growth factor binding protein 5
INHBA	inhibin, beta A
ISL1	ISL LIM homeobox 1
ITGA2	integrin, alpha 2 (CD49B, alpha 2 subunit of VLA-2 receptor)
JAG1	jagged 1
JARID2	jumonji, AT rich interactive domain 2
KCNA5	potassium voltage-gated channel, shaker-related subfamily, member 5
KCNJ2	potassium inwardly-rectifying channel, subfamily J, member 2
KCNMA1	potassium large conductance calcium-activated channel, subfamily M, alpha member 1
KIAA1967	KIAA1967
KIFAP3	kinesin-associated protein 3
KIT	v-kit Hardy-Zuckerman 4 feline sarcoma viral oncogene homolog
KITLG	KIT ligand
KLF3	Kruppel-like factor 3 (basic)
KLF6	Kruppel-like factor 6
KLF7	Kruppel-like factor 7 (ubiquitous)
LAMTOR3	MAPK scaffold protein 1
LDB2	LIM domain binding 2
LPHN2	latrophilin 2
LRP12	low density lipoprotein receptor-related protein 12
LRP1B	low density lipoprotein receptor-related protein 1B
LSAMP	limbic system-associated membrane protein
MAF	v-maf musculoaponeurotic fibrosarcoma oncogene homolog (avian)
MAP2K5	mitogen-activated protein kinase kinase 5
MAP3K8	mitogen-activated protein kinase kinase kinase 8
MAPK6	mitogen-activated protein kinase 6
MBP	myelin basic protein
MECOM	MDS1 and EVI1 complex locus
MEF2C	myocyte enhancer factor 2C
MEOX2	mesenchyme homeobox 2
MITF	microphthalmia-associated transcription factor
MKI67	antigen identified by monoclonal antibody Ki-67
MKLN1	muskelin 1, intracellular mediator containing kelch motifs
MPDZ	multiple PDZ domain protein
MVK	mevalonate kinase
NFIB	nuclear factor I/B
NOMO3	NODAL modulator 3
NOX3	NADPH oxidase 3
NPAS3	neuronal PAS domain protein 3
NR2F1	nuclear receptor subfamily 2, group F, member 1
NRP2	neuropilin 2
NRXN3	neurexin 3
NTM	neurotrimin
OPCML	opioid binding protein/cell adhesion molecule-like
ORC4	origin recognition complex, subunit 4
PAK3	p21 protein (Cdc42/Rac)-activated kinase 3
PARVA	parvin, alpha
PAWR	PRKC, apoptosis, WT1, regulator
PAX7	paired box 7
PBX3	pre-B-cell leukemia homeobox 3
PCDH9	protocadherin 9
PDE1A	phosphodiesterase 1A, calmodulin-dependent
PDGFRB	platelet-derived growth factor receptor, beta polypeptide
PEX2	peroxisomal biogenesis factor 2
PFKP	phosphofructokinase, platelet
PIAS1	protein inhibitor of activated STAT, 1
PIK3C3	phosphoinositide-3-kinase, class 3
PIP4K2A	phosphatidylinositol-5-phosphate 4-kinase, type II, alpha
PITX1	paired-like homeodomain 1
PITX3	paired-like homeodomain 3
PKIA	protein kinase (cAMP-dependent, catalytic) inhibitor alpha
PKN2	protein kinase N2
PNMA2	paraneoplastic antigen MA2
PNO1	partner of NOB1 homolog (S. cerevisiae)
PODXL	podocalyxin-like
POLR3G	polymerase (RNA) III (DNA directed) polypeptide G (32kD)
PPIC	peptidylprolyl isomerase C (cyclophilin C)
PPP1R12B	protein phosphatase 1, regulatory (inhibitor) subunit 12B
PPP2R3A	protein phosphatase 2, regulatory subunit B, alpha
PRDM1	PR domain containing 1, with ZNF domain
PRDM12	PR domain containing 12
PREP	prolyl endopeptidase
PRKACB	protein kinase, cAMP-dependent, catalytic, beta
PSAT1	phosphoserine aminotransferase 1
PSIP1	PC4 and SFRS1 interacting protein 1
PTDSS1	phosphatidylserine synthase 1
PTPRD	protein tyrosine phosphatase, receptor type, D
PTPRE	protein tyrosine phosphatase, receptor type, E
PTPRG	protein tyrosine phosphatase, receptor type, G
PTTG2	pituitary tumor-transforming 2
RAB28	RAB28, member RAS oncogene family
RASAL2	RAS protein activator like 2
RASGRF1	Ras protein-specific guanine nucleotide-releasing factor 1
RBMS3	RNA binding motif, single stranded interacting protein 3
RDX	radixin
RFC3	replication factor C (activator 1) 3, 38kDa
RIT2	Ras-like without CAAX 2
RORA	RAR-related orphan receptor A
RPS17	ribosomal protein S17
RPS24	ribosomal protein S24
RUNX1T1	runt-related transcription factor 1; translocated to, 1 (cyclin D-related)
RYBP	RING1 and YY1 binding protein
SATB1	SATB homeobox 1
SCGB1A1	secretoglobin, family 1A, member 1 (uteroglobin)
SCML1	sex comb on midleg-like 1 (Drosophila)
SH3GL2	SH3-domain GRB2-like 2
SIM1	single-minded homolog 1 (Drosophila)
SKAP2	src kinase associated phosphoprotein 2
SLC10A2	solute carrier family 10 (sodium/bile acid cotransporter family), member 2
SLC14A2	solute carrier family 14 (urea transporter), member 2
SLC30A4	solute carrier family 30 (zinc transporter), member 4
SLC39A1	solute carrier family 39 (zinc transporter), member 1
SLC4A3	solute carrier family 4, anion exchanger, member 3
SMARCA1	SWI/SNF related, matrix associated, actin dependent regulator of chromatin, subfamily a, member 1
SMNDC1	survival motor neuron domain containing 1
SNRPB2	small nuclear ribonucleoprotein polypeptide B
SOX14	SRY (sex determining region Y)-box 14
SOX3	SRY (sex determining region Y)-box 3
SOX9	SRY (sex determining region Y)-box 9
SQRDL	sulfide quinone reductase-like (yeast)
SRP54	signal recognition particle 54kDa
SRSF7	serine/arginine-rich splicing factor 7
SS18	synovial sarcoma translocation, chromosome 18
SSTR2	somatostatin receptor 2
STAP1	signal transducing adaptor family member 1
STX11	syntaxin 11
TCF4	transcription factor 4
TEAD1	TEA domain family member 1 (SV40 transcriptional enhancer factor)
TGFBR2	transforming growth factor, beta receptor II (70/80kDa)
TIMM9	translocase of inner mitochondrial membrane 9 homolog (yeast)
TRIM32	tripartite motif-containing 32
TXNL1	thioredoxin-like 1
USP2	ubiquitin specific peptidase 2
USP3	ubiquitin specific peptidase 3
UST	uronyl-2-sulfotransferase
UTRN	utrophin
WNT5A	wingless-type MMTV integration site family, member 5A
YKT6	YKT6 v-SNARE homolog (S. cerevisiae)
ZEB2	zinc finger E-box binding homeobox 2
ZFHX3	zinc finger homeobox 3
ZIC1	Zic family member 1 (odd-paired homolog, Drosophila)
ZMYM5	zinc finger, MYM-type 5
