# Supplementary figures and images for: Novel Approach for Coexpression Analysis of E2F1–3 and MYC Target Genes in Chronic Myelogenous Leukemia
Source: Hindawi journal article supplement (doi:10.1155/2014/439840), 2014-01-01

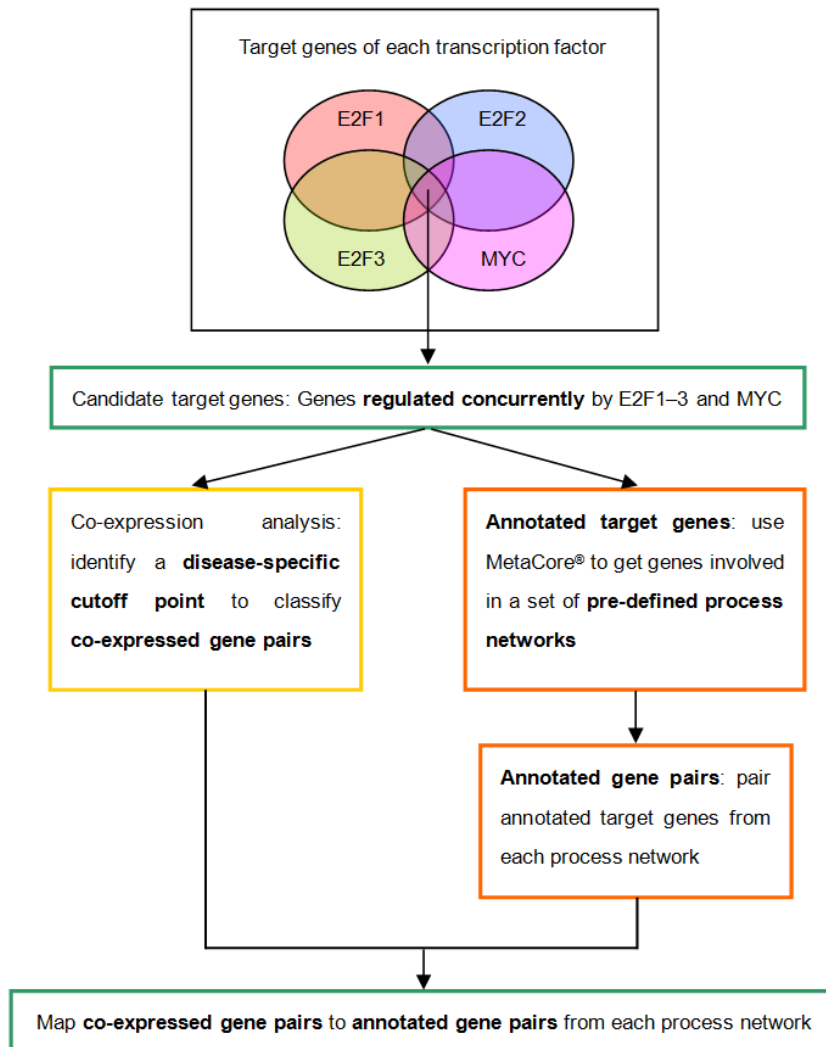

Figure S1. Flow chart for the E2F1-3 and MYC target genes co-expression analysis.

Supplement: f1 [file 439840.f1.zip]
